# Supplementary material for: Bioinformatics-Based Identification of Expanded Repeats: A Non-reference Intronic Pentamer Expansion in RFC1 Causes CANVAS
Source: PubMed Central journal article supplement (PMC6612533; doi:10.1016/j.ajhg.2019.05.016), 2019-06-20
Supplement: mmc1.pdf [file mmc1.pdf]

## Supplemental Data

### Bioinformatics-Based Identification of Expanded

### Repeats: A Non-reference Intronic Pentamer

### Expansion in *RFC1* Causes CANVAS

Haloom Rafehi, David J. Szmulewicz, Mark F. Bennett, Nara L.M. Sobreira, Kate Pope, Katherine R. Smith, Greta Gillies, Peter Diakumis, Egor Dolzhenko, Michael A. Eberle, María García Barcina, David P. Breen, Andrew M. Chancellor, Phillip D. Cremer, Martin B. Delatycki, Brent L. Fogel, Anna Hackett, G. Michael Halmagyi, Solange Kapetanovic, Anthony Lang, Stuart Mossman, Weiyi Mu, Peter Patrikios, Susan L. Perlman, Ian Rosemergy, Elsdon Storey, Shaun R.D. Watson, Michael A. Wilson, David S. Zee, David Valle, David J. Amor, Melanie Bahlo, and Paul J. Lockhart

CANVAS1

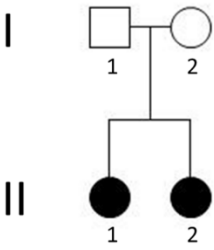

CANVAS2

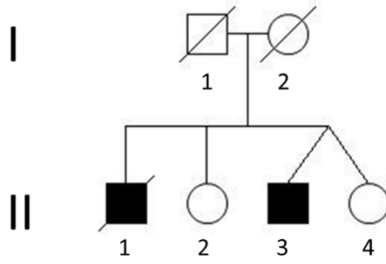

CANVAS3

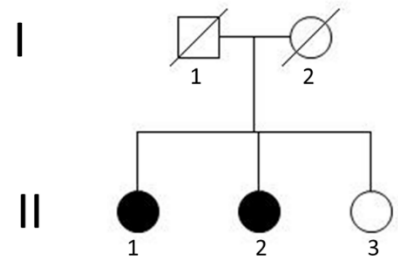

CANVAS4

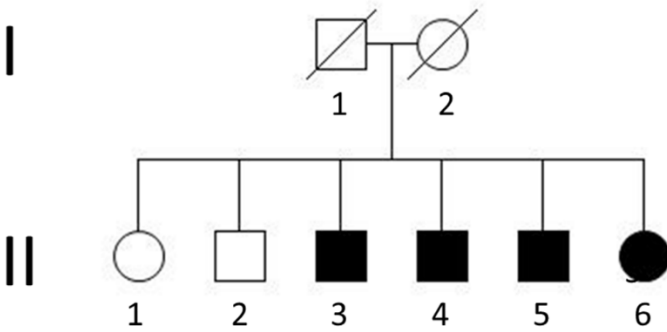

CANVAS17

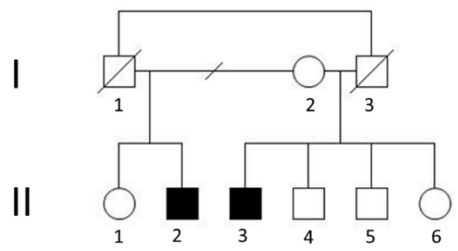

CANVAS9

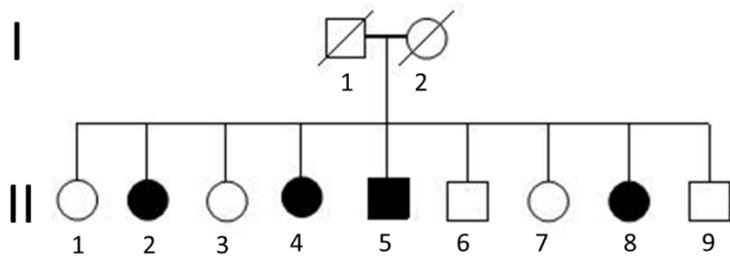

CANVAS21

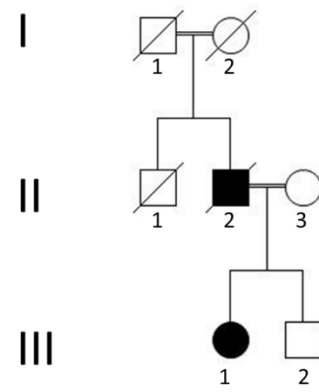

**Figure S1: Pedigree structure of CANVAS families utilized for linkage studies (CANVAS1, 2, 3, 4 and 9) or demonstrating multigenerational inheritance.**

PCR-based WGS,  
~60x coverage

PCR-free WGS,  
~30x coverage

CANVAS1

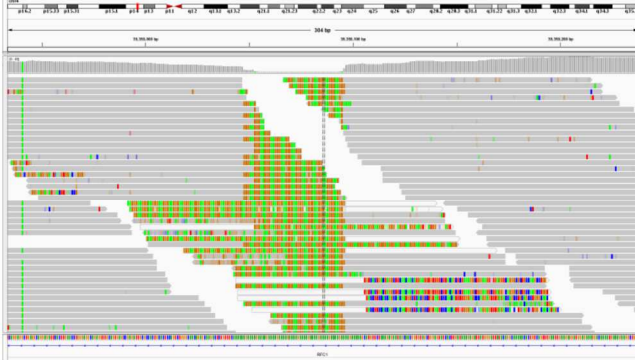

CANVAS2

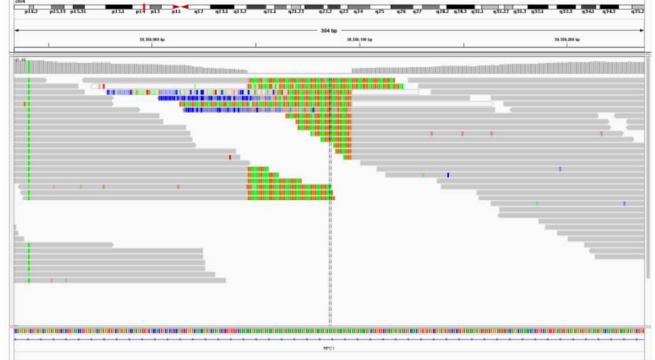

CANVAS9

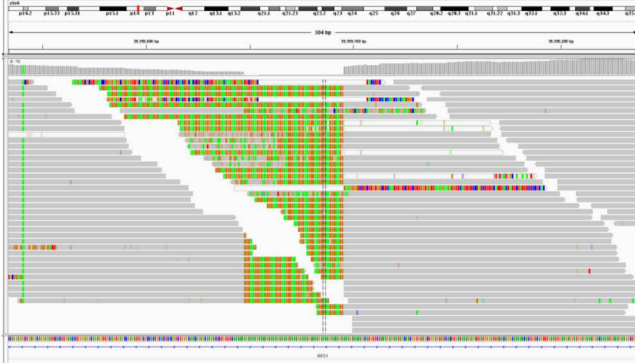

CANVAS8

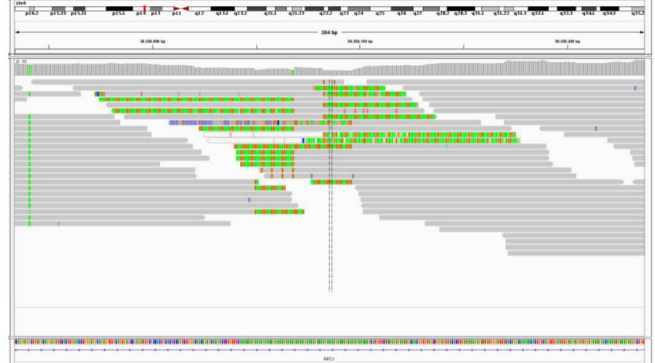

**Figure S2: IGV snapshots of the (AAGGG)<sub>n</sub> locus in *RFC1*.**

Illustrated are affected individuals from homozygous carriers of AAGGG (CANVAS1, 2, 9) and an individual who carries the AAGGG allele in addition to an expanded AAAGG allele (CANVAS8).



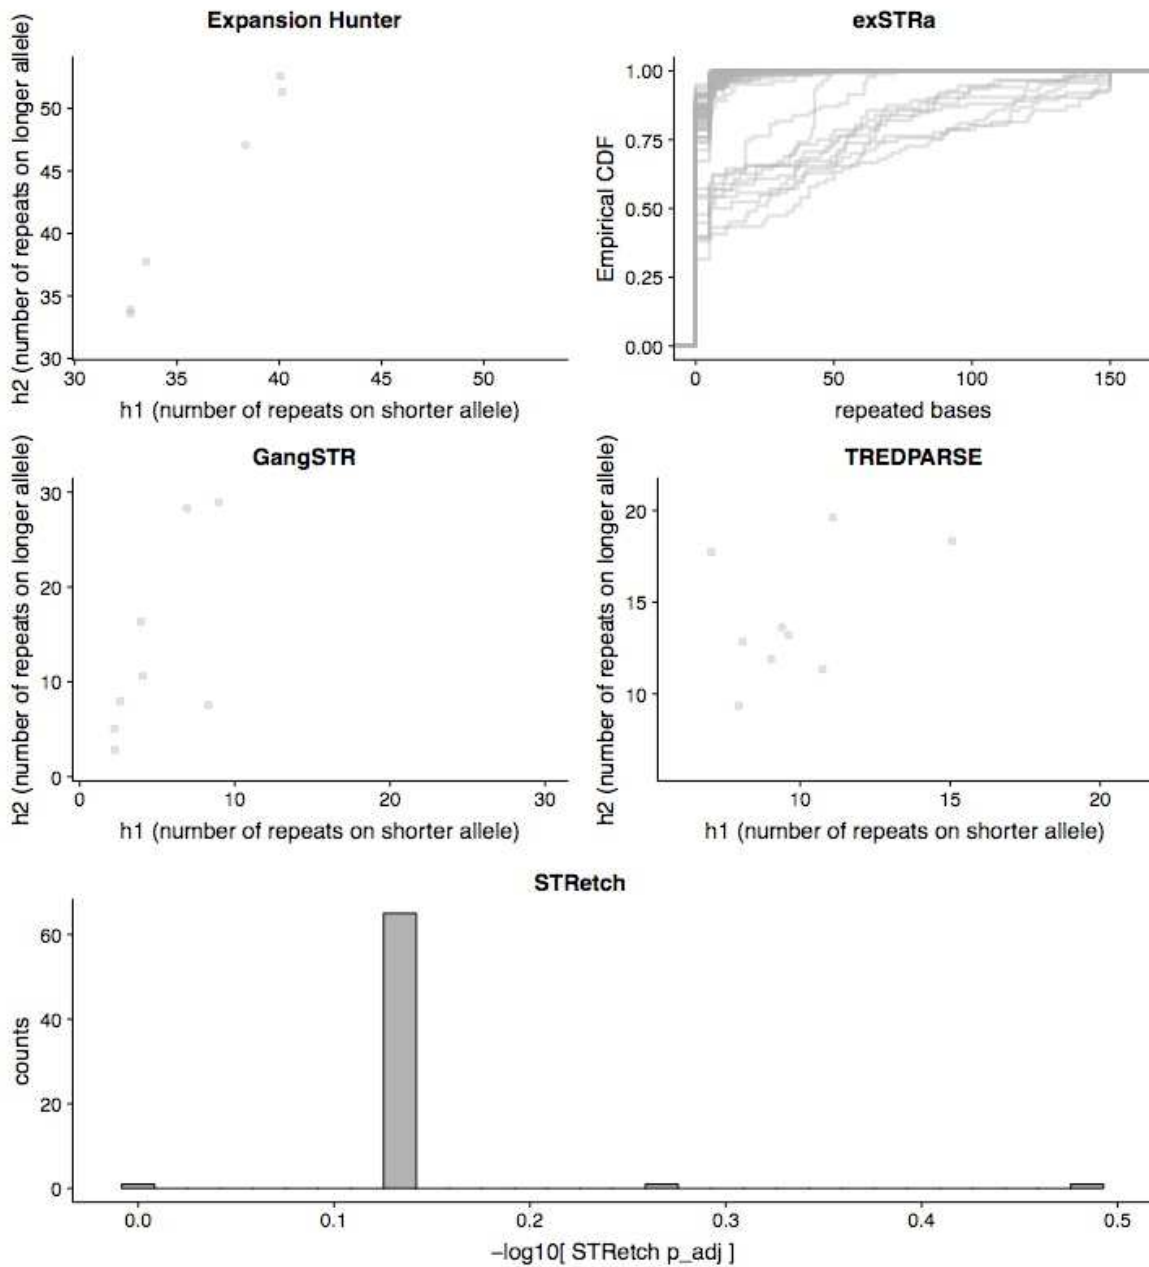

**Figure S4: Computational validation of the (AAGGG)<sub>n</sub> STR.**

The WGS from 69 unrelated non-CANVAS individuals (Coriell dataset) were analysed at the coordinate's chr4:39350045-39350095, using the tools exSTRa, EH, GangSTR, TREDPARSE and STRetch.

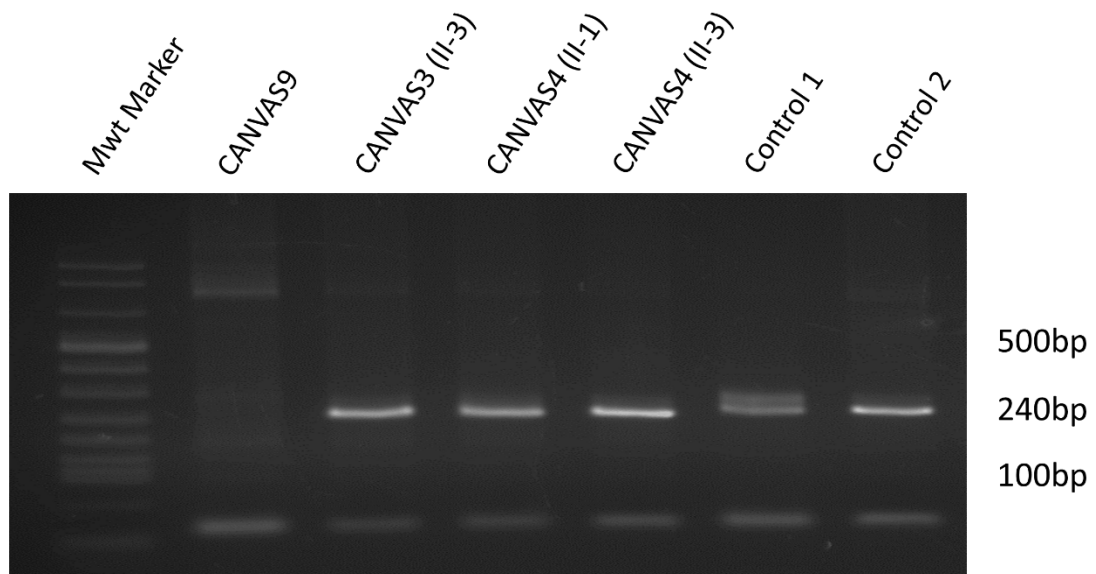

**Figure S5: PCR analysis of unaffected individuals from *RFC1* linked CANVAS families.** Genomic DNA from three unaffected family members from CANVAS3 and CANVAS4 was analysed for the presence of a non-expanded *RFC1* allele. All three individuals carried at least one non-expanded allele, as indicated by the ~250bp PCR product. CANVAS9 is homozygous for the expanded allele and indicates the pattern expected in the absence of the reference allele. Pedigree structure and affected status are illustrated in Figure S1.

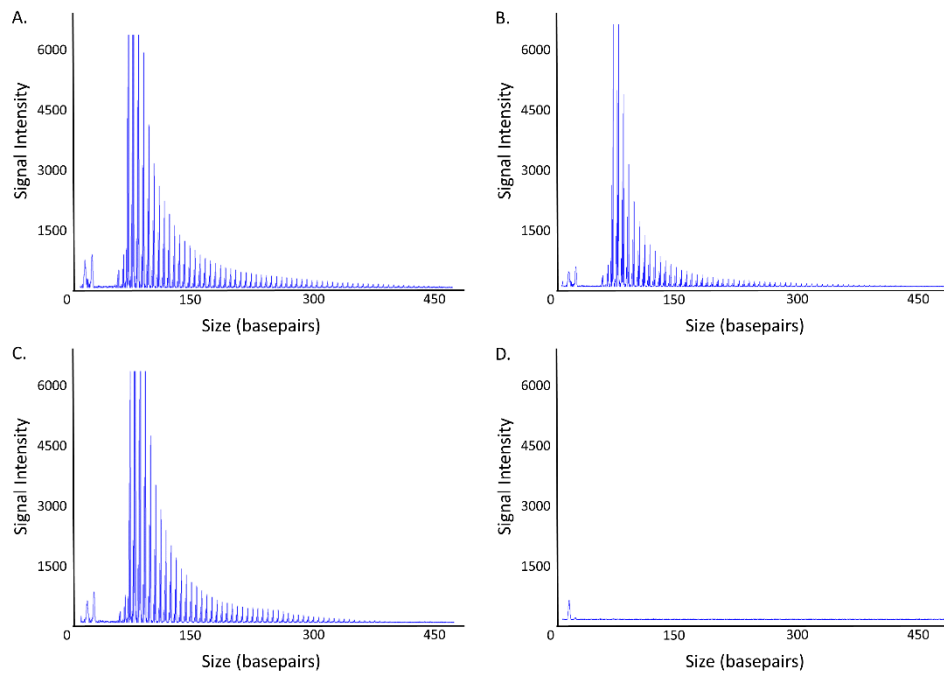

**Figure S6: Repeat-primed PCR analysis of unaffected individuals with (AAGGG)<sup>exp</sup> RE.**

Representative images of the repeat-primed PCR for the (AAGGG)<sup>exp</sup> RE demonstrating a saw-toothed product with 5 base pair repeat unit size, amplified from gDNA of control individuals with heterozygous (A, B) or homozygous (C) alleles encoding the (AAGGG)<sup>exp</sup> RE. No product was observed for the no gDNA template negative control (D).

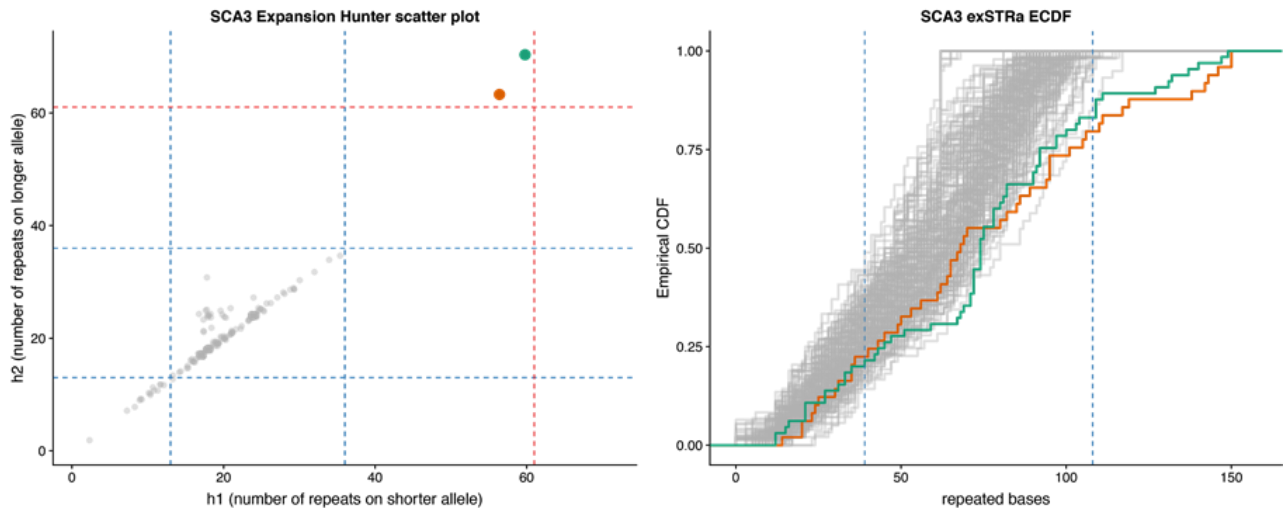

**Figure S7: Identification of a pathogenic SCA3 expansion in CANVAS13.**

The WGS data for SCA3 (green dot) and an individual with a confirmed SCA3 RE (orange dot) was analysed using ExpansionHunter and exSTRa. This analysis identified a heterozygous, pathogenic SCA3 expansion in CANVAS13.



| Primer name             | Position (hg19)         | Sequence                                        |
|-------------------------|-------------------------|-------------------------------------------------|
| CANVAS_RFC1_3F          | chr4: 39350172-39350192 | 5'-ACTGACAGTGTTTTTGCCTGT                        |
| CANVAS_RFC1_3R          | chr4:39349940-39349959  | 5'-GGCTGAGGCAGGAGATTCAC                         |
| TPP_CANVAS_FAM_2F       | chr4:39350172-39350192  | FAM-5'-ACTGACAGTGTTTTTGCCTGT                    |
| 5R_TPP_M13R_CANVAS_RE_R | NA                      | 5'-CAGGAAACAGCTATGACC_AAGGGAAGGGAAGGGAAGGGAAGGG |
| TPP_M13R                | NA                      | 5'-CAGGAAACAGCTATGACC                           |

**Table S1: Primer sequences for analysis of RFC1.**

The gene reference sequences utilized were NC\_000004.11 and NM\_002913.4 (*RFC1*).

| ENSEMBL Gene ID | Gene name     | Gene biotype   | OMIM gene ID | OMIM disease phenotype (phenotype, OMIM phenotype ID, inheritance pattern)                                                                                                              |
|-----------------|---------------|----------------|--------------|-----------------------------------------------------------------------------------------------------------------------------------------------------------------------------------------|
| ENSG00000121895 | TMEM156       | protein_coding | NA           | NA                                                                                                                                                                                      |
| ENSG00000109790 | KLHL5         | protein_coding | 608064       | NA                                                                                                                                                                                      |
| ENSG00000249207 | RP11-360F5.1  | antisense      | NA           | NA                                                                                                                                                                                      |
| ENSG00000249685 | RP11-360F5.3  | lincRNA        | NA           | NA                                                                                                                                                                                      |
| ENSG00000157796 | WDR19         | protein_coding | 608151       | ?Cranioectodermal dysplasia 4, 614378, AR; ?Short-rib thoracic dysplasia 5 with or without polydactyly, 614376, AR;Nephronophthisis 13, 614377, AR; Senior-Loken syndrome 8, 616307, AR |
| ENSG00000035928 | RFC1          | protein_coding | 102579       | NA                                                                                                                                                                                      |
| ENSG00000206675 | RNU6-32P      | snRNA          | NA           | NA                                                                                                                                                                                      |
| ENSG00000222592 | RNU6-887P     | snRNA          | NA           | NA                                                                                                                                                                                      |
| ENSG00000134962 | KLB           | protein_coding | 611135       | NA                                                                                                                                                                                      |
| ENSG00000264621 | MIR5591       | miRNA          | NA           | NA                                                                                                                                                                                      |
| ENSG00000238797 | Y_RNA         | misc_RNA       | NA           | NA                                                                                                                                                                                      |
| ENSG00000163682 | RPL9          | protein_coding | 603686       | NA                                                                                                                                                                                      |
| ENSG00000121897 | LIAS          | protein_coding | 607031       | Hyperglycinemia, lactic acidosis, and seizures, 614462, AR                                                                                                                              |
| ENSG00000224097 | RP11-472B18.1 | pseudogene     | NA           | NA                                                                                                                                                                                      |
| ENSG00000109814 | UGDH          | protein_coding | 603370       | NA                                                                                                                                                                                      |
| ENSG00000249348 | UGDH-AS1      | antisense      | NA           | NA                                                                                                                                                                                      |
| ENSG00000163683 | SMIM14        | protein_coding | NA           | NA                                                                                                                                                                                      |
| ENSG00000252796 | RNU7-11P      | snRNA          | NA           | NA                                                                                                                                                                                      |
| ENSG00000255458 | RP11-539G18.2 | lincRNA        | NA           | NA                                                                                                                                                                                      |
| ENSG00000078140 | UBE2K         | protein_coding | 602846       | NA                                                                                                                                                                                      |
| ENSG00000252975 | Y_RNA         | misc_RNA       | NA           | NA                                                                                                                                                                                      |
| ENSG00000249019 | RP11-539G18.1 | pseudogene     | NA           | NA                                                                                                                                                                                      |
| ENSG00000243260 | RN7SL558P     | misc_RNA       | NA           | NA                                                                                                                                                                                      |
| ENSG00000180610 | ZBTB12P1      | pseudogene     | NA           | NA                                                                                                                                                                                      |

|                 |               |                   |        |                                                                      |
|-----------------|---------------|-------------------|--------|----------------------------------------------------------------------|
| ENSG00000121892 | PDS5A         | protein_coding    | 613200 | NA                                                                   |
| ENSG00000271278 | TCEB1P33      | pseudogene        | NA     | NA                                                                   |
| ENSG00000252970 | RNA5SP159     | rRNA              | NA     | NA                                                                   |
| ENSG00000250568 | RP11-333E13.2 | pseudogene        | NA     | NA                                                                   |
| ENSG00000231707 | PABPC1P1      | pseudogene        | NA     | NA                                                                   |
| ENSG00000249064 | KRT18P25      | pseudogene        | NA     | NA                                                                   |
| ENSG00000205794 | RP11-333E13.4 | pseudogene        | NA     | NA                                                                   |
| ENSG00000078177 | N4BP2         | protein_coding    | NA     | NA                                                                   |
| ENSG00000200455 | RNU6-1112P    | snRNA             | NA     | NA                                                                   |
| ENSG00000201863 | SNORA51       | snoRNA            | NA     | NA                                                                   |
| ENSG00000248977 | RP11-395I6.1  | pseudogene        | NA     | NA                                                                   |
| ENSG00000260296 | RP11-395I6.3  | sense_overlapping | NA     | NA                                                                   |
| ENSG00000168421 | RHOH          | protein_coding    | 602037 | {?Epidermodysplasia verruciformis, susceptibility to, 4}, 618307, AR |
| ENSG00000250338 | RP11-395I6.2  | lincRNA           | NA     | NA                                                                   |
| ENSG00000249241 | AC195454.1    | lincRNA           | NA     | NA                                                                   |
| ENSG00000174343 | CHRNA9        | protein_coding    | 605116 | NA                                                                   |
| ENSG00000239010 | RNU7-74P      | snRNA             | NA     | NA                                                                   |
| ENSG00000250893 | RP11-588L15.2 | antisense         | NA     | NA                                                                   |

**Table S2. Genes and known disease associations within the CANVAS linkage region**

| region                    | repeat.              | pval   | adj | Func.refGene   | Gene.refGene           |
|---------------------------|----------------------|--------|-----|----------------|------------------------|
| chr4:39350095-39350508    | AAGGG                | 0.0027 | 1   | intronic       | RFC1                   |
| chr5:68499727-68500146    | AATATATATATATAG      | 0.0027 | 1   | intronic       | CENPH                  |
| chr7:157344383-157344946  | ACAGCCACCACCCACCCC   | 0.0027 | 1   | intronic       | PTPRN2                 |
| chr9:138739792-138740277  | AAGGGGAGGGGAGTGGGGGG | 0.0027 | 1   | intronic       | CAMSAP1                |
| chr11:100495523-100496852 | AATATGTGTATATATGT    | 0.0027 | 1   | intergenic     | CNTN5;<br>LOC100128386 |
| chr11:127149089-127150146 | AAG                  | 0.0027 | 1   | ncRNA_intronic | LOC101929497           |
| chr19:43901669-43901885   | AAATATATATTATATAT    | 0.0027 | 1   | intronic       | TEX101                 |
| chr20:43066951-43067388   | AAAAATATAATATAT      | 0.0027 | 1   | intergenic     | HNF4A;<br>LINC01430    |
| chr3:175416044-175416658  | ACACATACATATAT       | 0.0028 | 1   | intronic       | NAALADL2               |
| chr5:4286195-4286524      | AAGCTATATATATATAGTG  | 0.0028 | 1   | intergenic     | IRX1;<br>LINC02114     |
| chr5:74613999-74614513    | AAAG                 | 0.0028 | 1   | intergenic     | ANKRD31;<br>HMGCR      |
| chr6:165352545-165353525  | AAAG                 | 0.0028 | 1   | intergenic     | MEAT6;<br>C6orf118     |
| chr7:4930864-4931703      | AGAT                 | 0.0028 | 1   | intergenic     | RADIL; MMD2            |
| chr7:157846063-157847123  | ACCCAGAGACGCAGAG     | 0.0028 | 1   | intronic       | PTPRN2                 |
| chr10:134789654-134790481 | AATACATTCCACGTGTATC  | 0.0028 | 1   | ncRNA_exonic   | LINC01168              |
| chr11:2182294-2182840     | ACACCCCTGTCCCC       | 0.0028 | 1   | UTR5           | INS; INS-IGF2          |
| chr11:120746805-120747444 | ACC                  | 0.0028 | 1   | ncRNA_intronic | LOC101929227           |
| chr11:134177695-134179032 | ACC                  | 0.0028 | 1   | intronic       | GLB1L3                 |
| chr13:40788773-40788913   | AATATAT              | 0.0028 | 1   | ncRNA_intronic | LINC00548              |

**Table S3: Expansion Hunter de novo results - screening for RE in two CANVAS individuals compared to 31 controls (all PCR based WGS,  $p < 0.01$ ) ranked by p-value and ordered by chromosome**
